# Supplementary material for: Pueraria thomsonii Radix Water Extract Alleviate Type 2 Diabetes Mellitus in db/db Mice through Comprehensive Regulation of Metabolism and Gut Microbiota
Source: MDPI journal article supplement (doi:10.3390/molecules28227471), 2023-11-07
Supplement: s1 [file s1]

**Supplementary Table S6.** Analysis of Metformin metabolic pathway enrichment

| Pathway Name                                   | Match Status | -log(p) | Holm p    | FDR       | Impact  | Details          |
|------------------------------------------------|--------------|---------|-----------|-----------|---------|------------------|
| Fatty acid biosynthesis                        | 1/47         | 4.8527  | 3.6499E-4 | 2.4636E-4 | 0.0     | KEGG SMP         |
| Glycine, serine and<br>threonine metabolism    | 1/34         | 4.6184  | 6.0186E-4 | 2.4636E-4 | 0.0     | KEGG SMP         |
| Glycolysis /<br>Gluconeogenesis                | 2/26         | 4.5463  | 6.8222E-4 | 2.4636E-4 | 0.04443 | KEGG SMP SM<br>P |
| Biosynthesis of unsaturated<br>fatty acids     | 1/36         | 2.6078  | 0.056741  | 0.016035  | 0.0     | KEGG             |
| Glycerolipid metabolism                        | 1/16         | 2.178   | 0.14602   | 0.028761  | 0.01246 | KEGG SMP         |
| Phosphatidylinositol<br>signaling system       | 1/28         | 2.178   | 0.14602   | 0.028761  | 0.00152 | KEGG             |
| Steroid hormone<br>biosynthesis                | 4/77         | 1.8829  | 0.26189   | 0.048636  | 0.02841 | KEGG             |
| Citrate cycle (TCA cycle)                      | 1/20         | 1.6393  | 0.43602   | 0.054241  | 0.03273 | KEGG             |
| Alanine, aspartate and<br>glutamate metabolism | 1/28         | 1.6393  | 0.43602   | 0.054241  | 0.0     | KEGG SMP         |
| Propanoate metabolism                          | 1/23         | 1.6393  | 0.43602   | 0.054241  | 0.0     | KEGG SMP         |
| Butanoate metabolism                           | 1/15         | 1.6393  | 0.43602   | 0.054241  | 0.0     | KEGG             |
| Purine metabolism                              | 2/66         | 1.2166  | 0.91088   | 0.13157   | 0.07491 | KEGG SMP         |
| Starch and sucrose<br>metabolism               | 1/15         | 1.1737  | 0.93857   | 0.13408   | 0.0     | KEGG SMP         |
| Folate biosynthesis                            | 1/27         | 1.0398  | 1.0       | 0.16946   | 0.0     | KEGG             |
| Sphingolipid metabolism                        | 3/21         | 0.86849 | 1.0       | 0.23463   | 0.26978 | KEGG SMP         |
| Arginine and proline                           | 1/38         | 0.83888 | 1.0       | 0.23549   | 0.0     | KEGG SMP         |

|                            |      |           |     |         |         |          |
|----------------------------|------|-----------|-----|---------|---------|----------|
| metabolism                 |      |           |     |         |         |          |
| Caffeine metabolism        | 1/12 | 0.68523   | 1.0 | 0.31571 | 0.0     | KEGG SMP |
| Glycerophospholipid        |      |           |     |         |         |          |
| metabolism                 | 3/36 | 0.61614   | 1.0 | 0.34959 | 0.33882 | KEGG     |
| Linoleic acid metabolism   | 2/5  | 0.55501   | 1.0 | 0.38125 | 0.0     | KEGG     |
| Arachidonic acid           |      |           |     |         |         |          |
| metabolism                 | 5/36 | 0.52181   | 1.0 | 0.39096 | 0.0636  | KEGG SMP |
| alpha-Linolenic acid       |      |           |     |         |         |          |
| metabolism                 | 1/13 | 0.47896   | 1.0 | 0.41096 | 0.0     | KEGG     |
| Pyrimidine metabolism      | 2/39 | 0.34187   | 1.0 | 0.53787 | 0.19576 | KEGG SMP |
| Primary bile acid          |      |           |     |         |         |          |
| biosynthesis               | 1/46 | 0.28245   | 1.0 | 0.58992 | 0.0     | KEGG SMP |
| Glycosylphosphatidylinosit |      |           |     |         |         |          |
| ol (GPI)-anchor            |      |           |     |         |         |          |
| biosynthesis               | 1/14 | 0.10069   | 1.0 | 0.85916 | 0.00399 | KEGG     |
| Retinol metabolism         | 1/16 | 0.067713  | 1.0 | 0.88986 | 0.0     | KEGG SMP |
| N-Glycan biosynthesis      | 1/41 | 0.0040888 | 1.0 | 0.99063 | 0.0     | KEGG     |
