# Supplementary material for: Pueraria thomsonii Radix Water Extract Alleviate Type 2 Diabetes Mellitus in db/db Mice through Comprehensive Regulation of Metabolism and Gut Microbiota
Source: MDPI journal article supplement (doi:10.3390/molecules28227471), 2023-11-07
Supplement: s1 [file s1]

**Supplementary Table S1.** LC-MS data of the absorbed components of PTR in rat blood[12]<sup>#</sup>

| modle  | NO  | Retention<br>time | Name                                       | Formula   | Experimental<br>Mass | Secondary fragment ions                 | Mass<br>Error |
|--------|-----|-------------------|--------------------------------------------|-----------|----------------------|-----------------------------------------|---------------|
| [M-H]- | F1  | 9.38              | puerarin-4'-O- $\beta$ -D-glucopyranoside* | C27H30O14 | 577.1571             | 457.1132                                | 1.4           |
| [M-H]- | F2  | 14.51             | puerarin*                                  | C21H20O9  | 415.1039             | 295.0602,277.0489,267.0644              | -2.5          |
| [M-H]- | F3  | 15.19             | puerarin-6''-O-xyloside*                   | C26H28O13 | 547.1444             | 295.0570                                | -2.5          |
| [M-H]- | F4  | 15.72             | 3'-methoxy puerarin*                       | C22H22O10 | 445.1123             | 325.0699,310.0476,297.0738,282.0521     | -3.8          |
| [M-H]- | F5  | 15.91             | puerarin apioside*                         | C26H28O13 | 547.1455             | 295.0588,267.0642                       | -0.5          |
| [M-H]- | F6  | 17.65             | p-Hydroxycinnamic acid*                    | C9H8O3    | 163.0395             | 119.0495                                | -3.6          |
| [M+H]+ | F7  | 17.82             | daidzin*                                   | C21H20O9  | 417.1172             | 255.0646                                | -2.0          |
| [M-H]- | F8  | 23.91             | salicylic acid*                            | C7H6O3    | 137.0244             | 93.0348                                 | -0.1          |
| [M+H]+ | F9  | 29.53             | ononin*                                    | C22H22O9  | 431.1334             | 269.0797                                | -0.5          |
| [M-H]- | F10 | 30.74             | daidzein*                                  | C15H10O4  | 253.0495             | 224.0459,208.0507                       | -4.4          |
| [M-H]- | F11 | 37.61             | naringenin*                                | C15H12O5  | 271.0596             | 151.0011,119.0504                       | -5.9          |
| [M-H]- | F12 | 37.88             | genistein*                                 | C15H10O5  | 269.0454             | 269.0447                                | -0.6          |
| [M-H]- | F13 | 39.19             | isoliquiritigenin*                         | C15H12O4  | 255.0650             | 135.0078,119.0510,91.0196               | -4.9          |
| [M-H]- | F14 | 39.45             | formononetin*                              | C16H12O4  | 267.0648             | 252.0410,223.1684,195.0436              | -5.7          |
| [M-H]- | F15 | 40.38             | biochanin A*                               | C16H12O5  | 283.0600             | 267.0286,240.0426,<br>239.0321,211.0366 | -4.3          |

Note \*: indicates confirmation by comparison with reference material; [12]<sup>#</sup>: Adapted from Honghua Yu, Xiaowei Meng, and **Jiarong Li**(2022 China journal of Chinese materia medica).
