# Supplementary material for: Pueraria thomsonii Radix Water Extract Alleviate Type 2 Diabetes Mellitus in db/db Mice through Comprehensive Regulation of Metabolism and Gut Microbiota
Source: MDPI journal article supplement (doi:10.3390/molecules28227471), 2023-11-07
Supplement: s1 [file s1]

**Supplementary Table S3.** Differential metabolites for PTR callbacks

| Modle | Name                                       | Normal        | Model          | Up/d<br>own | PTR           | Up/do<br>wn | Metformin     | Up/do<br>wn |
|-------|--------------------------------------------|---------------|----------------|-------------|---------------|-------------|---------------|-------------|
| ESI-  | 13-L-Hydroperoxylinoleic acid              | 5.23±2.75     | 117.8±70.87    | ↑           | 15.26±21.40   | ↓           | 24.54±29.46   | ↓           |
|       | 13-L-Hydroperoxylinoleic acid              | 0.51±0.50     | 38.89±27.04    | ↑           | 4.89±7.15     | ↓           | 25.06±52.20   | ↓           |
|       | 11,12-Epoxyeicosatrienoic acid             | 15.99±7.74    | 49.73±13.08    | ↑           | 20.01±13.46   | ↓           | 7.66±5.88     | ↓           |
|       | 5-HETE                                     | 15.99±7.74    | 49.73±13.08    | ↑           | 20.01±13.46   | ↓           | 7.66±5.88     | ↓           |
|       | Leukotriene D4                             | 16.42±7.20    | 84.76±37.20    | ↑           | 32.76±38.05   | ↓           | 40.52±35.08   | ↓           |
|       | Prostaglandin H3                           | 1.51±1.41     | 227.25±126.75  | ↑           | 30.71±50.87   | ↓           | 138.91±252.25 | ↓           |
|       | 11,12-Epoxyeicosatrienoic acid             | 1.96±2.91     | 79.06±97.48    | ↑           | 9.31±12.73    | ↓           | 33.47±53.63   | ↓           |
|       | 5a-Pregnane-3,20-dione                     | 419.94±110.86 | 1421.76±580.48 | ↑           | 885.82±519.57 | ↓           | 654.02±513.41 | ↓           |
|       | 2-Methoxy-estradiol-17b 3-glucuronide      | 51.17±16.50   | 180.9±58.08    | ↑           | 78.79±66.60   | ↓           | 89.81±69.88   | ↓           |
|       | 11b,21-Dihydroxy-3,20-oxo-5b-pregnan-18-al | 9.27±8.25     | 494.54±478.32  | ↑           | 70.37±99.37   | ↓           | 472.08±790.00 | ↓           |
|       | Estrone                                    | 6.35±2.49     | 41.93±17.60    | ↑           | 15.82±18.54   | ↓           | 50.38±94.13   | ↑           |
|       | 5-L-Glutamyl-taurine                       | 303.25±81.12  | 14.06±8.54     | ↓           | 188.23±398.96 | ↑           | 10.53±5.81    | ↓           |
|       | 5-L-Glutamyl-taurine                       | 215.19±65.25  | 36.6±20.49     | ↓           | 199.43±333.91 | ↑           | 22.44±12.34   | ↓           |
|       | Oxidized glutathione                       | 4.14±5.43     | 37.54±23.34    | ↑           | 10.67±16.19   | ↓           | 4.13±6.99     | ↓           |
|       | Myristic acid                              | 49.01±13.99   | 115.44±29.02   | ↑           | 77.58±35.44   | ↓           | 53.59±22.00   | ↓           |
|       | Chitobiose                                 | 47.32±18.41   | 162.84±38.96   | ↑           | 75.88±53.87   | ↓           | 48.67±43.82   | ↓           |

|      |                                              |                  |                   |   |                   |   |                   |   |
|------|----------------------------------------------|------------------|-------------------|---|-------------------|---|-------------------|---|
|      | Stearidonic acid                             | 1.83±3.33        | 143.68±98.35      | ↑ | 31.95±46.10       | ↓ | 8.88±18.96        | ↓ |
|      | 2,3-Diphosphoglyceric acid                   | 52.06±17.34      | 128.62±29.17      | ↑ | 121.09±41.16      | ↓ | 93.17±33.69       | ↓ |
|      | Deoxyguanosine                               | 50.19±20.83      | 139.25±31.29      | ↑ | 119.56±49.32      | ↓ | 94.47±39.78       | ↓ |
|      | Glucaric acid                                | 43.27±19.25      | 4.04±4.20         | ↓ | 7.71±9.82         | ↑ | 2.19±2.04         | ↓ |
|      | Myristic acid                                | 109.84±27.55     | 468.79±144.10     | ↑ | 222.72±103.53     | ↓ | 128.76±71.83      | ↓ |
|      | Dihomo-gamma-linolenic acid                  | 92.62±28.55      | 193.39±72.82      | ↑ | 157.38±81.43      | ↓ | 133.39±109.52     | ↓ |
| ESI+ | 12-Keto-tetrahydro-leukotriene B4            | 1048.74±973.85   | 395.47±129.55     | ↓ | 530.97±134.04     | ↑ | 465.45±143.25     | ↑ |
|      | Inosinic acid                                | 566.82±272.11    | 192.92±126.99     | ↑ | 305.71±118.47     | ↑ | 174.12±137.58     | ↓ |
|      | LacCer(d18:1/25:0)                           | 112.72±110.16    | 1676.13±1378.91   | ↑ | 811.7±593.07      | ↓ | 889.08±635.88     | ↓ |
|      | 3-O-Sulfogalactosylceramide (d18:1/18:1(9Z)) | 24082.3±17753.64 | 68158.93±57739.78 | ↑ | 40884.38±23442.19 | ↓ | 37987.34±23998.72 | ↓ |
|      | Corticosterone                               | 611.76±703.62    | 2536.35±830.51    | ↑ | 2073.39±576.52    | ↓ | 3278.3±650.40     | ↑ |
|      | 5-Methoxyindoleacetate                       | 209.06±41.23     | 493.89±120.13     | ↑ | 346.96±104.56     | ↓ | 715.01±262.34     | ↑ |
|      | D-Glucose                                    | 601.99±189.28    | 3014.81±953       | ↑ | 2211.98±676.49    | ↓ | 969.77±855.22     | ↓ |
|      | Octanoyl-CoA                                 | 136.04±289.67    | 525.94±449.6      | ↑ | 373.51±590.75     | ↓ | 1748.45±4602.18   | ↑ |
|      | PE(20:3(8Z,11Z,14Z)/P-18:0)                  | 1464.82±912.57   | 4857.29±3210.04   | ↑ | 3287.19±2746.80   | ↓ | 4517.88±4230.66   | ↓ |
|      | PE(20:3(5Z,8Z,11Z)/P-18:0)                   | 1464.82±912.57   | 4857.29±3210.04   | ↑ | 3287.19±2746.80   | ↓ | 4517.88±4230.66   | ↓ |
|      | PE(20:2(11Z,14Z)/P-18:1(11Z))                | 1464.82±912.57   | 4857.29±3210.04   | ↑ | 3287.19±2746.80   | ↓ | 4517.88±4230.66   | ↓ |
|      | PE(20:2(11Z,14Z)/P-18:1(9Z))                 | 1464.82±912.57   | 4857.29±3210.04   | ↑ | 3287.19±2746.80   | ↓ | 4517.88±4230.66   | ↓ |

|                                            |                   |                   |   |                   |   |                   |   |
|--------------------------------------------|-------------------|-------------------|---|-------------------|---|-------------------|---|
| L-Allothreonine                            | 231.76±53.49      | 36.28±10.82       | ↓ | 50.96±10.34       | ↑ | 80.66±26.25       | ↑ |
| L-Valine                                   | 490.05±171.81     | 98.10±38.54       | ↓ | 108.54±35.96      | ↑ | 64.24±26.57       | ↓ |
| 3beta-Hydroxy-5-cholestenoic acid          | 10.61±12.32       | 552.16±255.49     | ↑ | 323.88±128.62     | ↓ | 488.98±187.49     | ↓ |
| LysoPA(P-16:0/0:0)                         | 1887.12±335.93    | 798.35±135        | ↓ | 972.99±122        | ↑ | 567.32±152.96     | ↓ |
| Retinoyl b-glucuronide                     | 451.78±91.88      | 201.27±55.26      | ↓ | 205.83±28.27      | ↑ | 206.01±65.41      | ↑ |
| Pregnanediol 3-O-glucuronide               | 1.16±1.52         | 596.71±1494.4     | ↑ | 435.65±950.30     | ↓ | 160.17±501.95     | ↓ |
| 5-Acetylamino-6-formylamino-3-methyluracil | 25.90±10.73       | 396.87±711.02     | ↑ | 27.97±4.55        | ↓ | 98.70±166.11      | ↓ |
| 5-Acetylamino-6-formylamino-3-methyluracil | 25.90±10.73       | 396.87±711.02     | ↑ | 27.97±4.55        | ↓ | 98.70±166.11      | ↓ |
| PC(22:4(7Z,10Z,13Z,16Z)/P-16:0)            | 14591.12±15077.24 | 57314.16±73203.13 | ↑ | 26963.18±24312.5  | ↓ | 30779.08±31862.64 | ↓ |
| PC(20:4(5Z,8Z,11Z,14Z)/P-18:0)             | 14591.12±15077.24 | 57314.16±73203.13 | ↑ | 26963.18±24312.50 | ↓ | 30779.08±31862.64 | ↓ |
| dUMP                                       | 324.58±123.12     | 103.79±29.58      | ↓ | 184.69±37.50      | ↑ | 130.73±32.29      | ↑ |
| 7alpha-Hydroxycholesterol                  | 405.93±336.97     | 127.24±17.68      | ↓ | 130.11±19.53      | ↑ | 116.53±16.78      | ↓ |
| 24-Hydroxycalcitriol                       | 192.29±72.50      | 441.69±111.43     | ↑ | 401.48±101.01     | ↓ | 740.14±180.84     | ↑ |
| 5-Thymidylic acid                          | 497.61±544.12     | 2122.12±1346.42   | ↑ | 1677.69±988.40    | ↓ | 1780.46±524.14    | ↓ |
| Succinic acid                              | 157.26±37.15      | 608.65±330.25     | ↑ | 528.56±258.75     | ↓ | 330.88±157.75     | ↓ |
| Hydroxykynurenine                          | 111.64±31.68      | 316.89±71.56      | ↑ | 213.53±53.80      | ↓ | 180.43±83.52      | ↓ |
| 9,10-EOA                                   | 118.33±62.50      | 462.34±103.71     | ↑ | 28.93±81.12       | ↓ | 66.14±83.12       | ↓ |
| 12,13-EpOME                                | 83.80±20.47       | 169.71±59.65      | ↑ | 44.00±48.94       | ↓ | 21.05±25.15       | ↓ |

|                                                       |                |                 |   |                 |   |                 |   |
|-------------------------------------------------------|----------------|-----------------|---|-----------------|---|-----------------|---|
| Spermine                                              | 83.80±20.47    | 169.71±59.65    | ↑ | 44.00±48.94     | ↓ | 21.05±25.15     | ↓ |
| SM(d18:1/26:1(17Z))                                   | 7.72±9.63      | 40.34±19.40     | ↑ | 4.56±7.20       | ↓ | 4.00±6.65       | ↓ |
| 3beta-Hydroxypregn-5-en-20-one sulfate                | 18.02±6.83     | 78.37±38.48     | ↑ | 1.30±2.23       | ↓ | 50.05±103.88    | ↓ |
| Dehydroepiandrosterone sulfate                        | 24.16±9.49     | 74.72±26.30     | ↑ | 18.96±16.24     | ↓ | 17.46±12.49     | ↓ |
| Cortisol                                              | 42.05±32.20    | 394.79±497.67   | ↑ | 39.61±64.27     | ↓ | 116.49±242.76   | ↓ |
| Cortisol                                              | 8.07±8.55      | 103.66±146.81   | ↑ | 5.42±13.13      | ↓ | 25.99±56.50     | ↓ |
| 11b,21-Dihydroxy-3,20-oxo-5b-pregnan-18-al            | 171.58±41.18   | 345.22±146.90   | ↑ | 74.19±92.74     | ↓ | 86.54±108.68    | ↓ |
| Taurocholic acid                                      | 2715.54±987.72 | 8668.35±2877.01 | ↑ | 701.56±2109.59  | ↓ | 233.06±531.20   | ↓ |
| 5-Methoxyindoleacetate                                | 299.31±90.20   | 769.36±312.72   | ↑ | 30.51±51.14     | ↓ | 182.68±372.96   | ↓ |
| LysoPC(20:4(8Z,11Z,14Z,17Z)/0:0)                      | 22.00±9.33     | 55.07±20.99     | ↑ | 7.69±12.84      | ↓ | 15.50±26.03     | ↓ |
| Indoleacetaldehyde                                    | 61.75±22.08    | 173.26±79.66    | ↑ | 8.87±11.35      | ↓ | 37.88±78.20     | ↓ |
| Orotidylic acid                                       | 39.57±15.98    | 99.37±41.60     | ↑ | 18.57±19.24     | ↓ | 27.95±40.34     | ↓ |
| 7,8-Dihydro-7-hydroxy-8-S-glutathionyl-benzo[a]pyrene | 46.17±17.39    | 115.08±35.02    | ↑ | 45.15±35.96     | ↓ | 26.31±23.61     | ↓ |
| Tetrahydrofolyl-[Glu](2)                              | 222.00±144.65  | 50.16±22.42     | ↓ | 525.67±333.74   | ↑ | 189.22±270.73   | ↑ |
| Riboflavin reduced                                    | 151.59±88.03   | 446.37±371.84   | ↑ | 23.07±26.04     | ↓ | 61.37±59.39     | ↓ |
| Dihomo-gamma-linolenic acid                           | 2179.79±443.66 | 4525.65±1071.58 | ↑ | 1809.02±1706.24 | ↓ | 2654.01±1489.12 | ↓ |
| Melibiitol                                            | 23.57±8.00     | 59.05±20.91     | ↑ | 13.33±21.05     | ↓ | 14.57±22.27     | ↓ |
| Taurochenodesoxycholic acid                           | 93.71±35.81    | 662.2±939.04    | ↑ | 54.44±90.91     | ↓ | 23.87±63.64     | ↓ |

|                      |             |              |   |             |   |               |   |
|----------------------|-------------|--------------|---|-------------|---|---------------|---|
| Inosine              | 45.56±9.49  | 100.34±54.31 | ↑ | 6.70±13.05  | ↓ | 23.83±48.44   | ↓ |
| LysoPA(18:1(9Z)/0:0) | 33.34±13.90 | 81.2±21.10   | ↑ | 14.86±20.26 | ↓ | 23.48±33.83   | ↓ |
| Indoleacetic acid    | 27.02±8.03  | 85.85±40.24  | ↑ | 12.86±21.31 | ↓ | 113.38±233.99 | ↑ |
