# Supplementary material for: Pueraria thomsonii Radix Water Extract Alleviate Type 2 Diabetes Mellitus in db/db Mice through Comprehensive Regulation of Metabolism and Gut Microbiota
Source: MDPI journal article supplement (doi:10.3390/molecules28227471), 2023-11-07
Supplement: s1 [file s1]

**Supplementary Table S5.** Analysis of PTR metabolic pathway enrichment

| Pathway Name                                 | Match Status | -log(p) | Holm p    | FDR       | Impact  | Details       |
|----------------------------------------------|--------------|---------|-----------|-----------|---------|---------------|
| Taurine and hypotaurine metabolism           | 2/8          | 6.8401  | 5.7805E-6 | 2.964E-6  | 0.0     | KEGG SMP      |
| Primary bile acid biosynthesis               | 4/46         | 6.8291  | 5.7805E-6 | 2.964E-6  | 0.06417 | KEGG SMP      |
| Tryptophan metabolism                        | 3/41         | 3.7534  | 0.0067052 | 0.0021579 | 0.0139  | KEGG SMP      |
| Riboflavin metabolism                        | 1/4          | 3.666   | 0.0079842 | 0.0021579 | 0.0     | KEGG SMP      |
| Glutathione metabolism                       | 2/28         | 3.3235  | 0.017091  | 0.0027412 | 0.02698 | KEGG SMP      |
| beta-Alanine metabolism                      | 1/21         | 3.319   | 0.017091  | 0.0027412 | 0.05597 | KEGG SMP      |
| Arginine and proline metabolism              | 1/38         | 3.319   | 0.017091  | 0.0027412 | 0.0     | KEGG SMP      |
| Glycerolipid metabolism                      | 1/16         | 2.7966  | 0.052718  | 0.0071    | 0.01246 | KEGG SMP      |
| Phosphatidylinositol signaling system        | 1/28         | 2.7966  | 0.052718  | 0.0071    | 0.00152 | KEGG          |
| Glycine, serine and threonine metabolism     | 1/34         | 2.5244  | 0.092684  | 0.011959  | 0.0     | KEGG SMP      |
| Purine metabolism                            | 3/66         | 1.7577  | 0.52415   | 0.059558  | 0.13284 | KEGG SMP      |
| Metabolism of xenobiotics by cytochrome P450 | 1/64         | 1.7479  | 0.52415   | 0.059558  | 0.0     | KEGG          |
| Glycolysis / Gluconeogenesis                 | 2/26         | 1.5236  | 0.83852   | 0.085352  | 0.04443 | KEGG SMP SM P |
| Steroid hormone biosynthesis                 | 7/77         | 1.4957  | 0.86229   | 0.085352  | 0.10964 | KEGG          |
| Ascorbate and aldarate                       | 1/10         | 1.4948  | 0.86229   | 0.085352  | 0.0     | KEGG          |

|                                                        |      |         |     |         |         |          |
|--------------------------------------------------------|------|---------|-----|---------|---------|----------|
| metabolism                                             |      |         |     |         |         |          |
| Galactose metabolism                                   | 1/27 | 1.1258  | 1.0 | 0.18714 | 0.03577 | KEGG SMP |
| Caffeine metabolism                                    | 1/12 | 1.0081  | 1.0 | 0.23096 | 0.0     | KEGG SMP |
| Sphingolipid metabolism                                | 3/21 | 0.80391 | 1.0 | 0.34904 | 0.0     | KEGG SMP |
| Folate biosynthesis                                    | 1/27 | 0.70755 | 1.0 | 0.35187 | 0.0     | KEGG     |
| Glycerophospholipid metabolism                         | 3/36 | 0.69438 | 1.0 | 0.35187 | 0.33882 | KEGG     |
| Arachidonic acid metabolism                            | 4/36 | 0.69396 | 1.0 | 0.35187 | 0.0424  | KEGG SMP |
| Linoleic acid metabolism                               | 3/5  | 0.69395 | 1.0 | 0.35187 | 0.0     | KEGG     |
| alpha-Linolenic acid metabolism                        | 2/13 | 0.69395 | 1.0 | 0.35187 | 0.0     | KEGG     |
| Glycosylphosphatidylinositol (GPI)-anchor biosynthesis | 1/14 | 0.65376 | 1.0 | 0.3699  | 0.00399 | KEGG     |
| Biosynthesis of unsaturated fatty acids                | 1/36 | 0.63577 | 1.0 | 0.37012 | 0.0     | KEGG     |
| Pyrimidine metabolism                                  | 3/39 | 0.4317  | 1.0 | 0.5538  | 0.26541 | KEGG SMP |
| Steroid biosynthesis                                   | 1/42 | 0.42554 | 1.0 | 0.5538  | 0.0     | KEGG SMP |
| Fatty acid biosynthesis                                | 1/47 | 0.34339 | 1.0 | 0.5538  | 0.0     | KEGG SMP |
| Fatty acid degradation                                 | 1/39 | 0.30867 | 1.0 | 0.5538  | 0.02355 | KEGG SMP |
| Fatty acid elongation                                  | 1/39 | 0.30867 | 1.0 | 0.5538  | 0.01148 | KEGG SMP |
| Valine, leucine and isoleucine degradation             | 1/40 | 0.29304 | 1.0 | 0.5538  | 0.0     | KEGG SMP |
| Valine, leucine and isoleucine biosynthesis            | 1/8  | 0.29304 | 1.0 | 0.5538  | 0.0     | KEGG     |

|                            |      |          |     |         |         |             |
|----------------------------|------|----------|-----|---------|---------|-------------|
| Pantothenate and CoA       |      |          |     |         |         |             |
| biosynthesis               | 1/19 | 0.29304  | 1.0 | 0.5538  | 0.0     | KEGG SMP    |
| Aminoacyl-tRNA             |      |          |     |         |         |             |
| biosynthesis               | 1/48 | 0.29304  | 1.0 | 0.5538  | 0.0     | KEGG        |
| Citrate cycle (TCA cycle)  | 1/20 | 0.27893  | 1.0 | 0.5538  | 0.03273 | KEGG        |
| Alanine, aspartate and     |      |          |     |         |         |             |
| glutamate metabolism       | 1/28 | 0.27893  | 1.0 | 0.5538  | 0.0     | KEGG SMP    |
| Propanoate metabolism      | 1/23 | 0.27893  | 1.0 | 0.5538  | 0.0     | KEGG SMP    |
| Butanoate metabolism       | 1/15 | 0.27893  | 1.0 | 0.5538  | 0.0     | KEGG        |
| Amino sugar and nucleotide |      |          |     |         |         | KEGG SMP SM |
| sugar metabolism           | 1/37 | 0.21709  | 1.0 | 0.62216 | 0.0     | P           |
| Retinol metabolism         | 1/16 | 0.092641 | 1.0 | 0.8079  | 0.0     | KEGG SMP    |
