# Supplementary material for: Pueraria thomsonii Radix Water Extract Alleviate Type 2 Diabetes Mellitus in db/db Mice through Comprehensive Regulation of Metabolism and Gut Microbiota
Source: MDPI journal article supplement (doi:10.3390/molecules28227471), 2023-11-07
Supplement: s1 [file s1]

Supplementary Table S2. Differential metabolites

| modle | NO  | HMDB ID | Retention<br>time | Name                                       | Formula     | Experimental<br>Mass | Ion Mode | Mass Error   | MS/MS<br>quantity | levels |
|-------|-----|---------|-------------------|--------------------------------------------|-------------|----------------------|----------|--------------|-------------------|--------|
| ESI-  | P1  | 0003871 | 6.72              | 13-L-Hydroperoxylinoleic acid              | C18H32O4    | 333.205145           | M+Na-2H  | 1.33761043   | 12                | ↑      |
|       | P2  | 0003871 | 6.23              | 13-L-Hydroperoxylinoleic acid              | C18H32O4    | 333.2045847          | M+Na-2H  | -0.456798865 | 14                | ↑      |
|       | P3  | 0004701 | 9.41              | 9,10-EOA                                   | C18H32O3    | 295.2277627          | M-H      | -0.35696978  | 8                 | ↑      |
|       | P4  | 0004702 | 9.41              | 12,13-EpOME                                | C18H32O3    | 295.2277627          | M-H      | -0.35696978  | 8                 | ↑      |
|       | P5  | 0001256 | 8.42              | Spermine                                   | C10H26N4    | 239.164631           | M+K-2H   | 1.379597855  | 2                 | ↑      |
|       | P6  | 0005050 | 6.90              | 15H-11,12-EETA                             | C20H32O4    | 371.2025             | M+Cl     | -0.060850098 | 18                | ↓      |
|       | P7  | 0004673 | 18.15             | 11,12-Epoxyeicosatrienoic acid             | C20H32O3    | 365.2282             | M+Na     | 3.620233869  | 6                 | ↑      |
|       | P8  | 0011134 | 18.15             | 5-HETE                                     | C20H32O3    | 365.2282             | M+Na     | 3.620233869  | 6                 | ↑      |
|       | P9  | 0003080 | 20.00             | Leukotriene D4                             | C25H40N2O6S | 533.2077227          | M+K-2H   | -3.204984531 | 3                 | ↑      |
|       | P10 | 0013040 | 6.12              | Prostaglandin H3                           | C20H30O5    | 331.1900557          | M-H2O-H  | -4.0754055   | 19                | ↑      |
|       | P11 | 0004673 | 5.82              | 11,12-Epoxyeicosatrienoic acid             | C20H32O3    | 365.2318088          | M-H      | -4.80572325  | 16                | ↑      |
|       | P12 | 0011136 | 11.06             | 19(S)-HETE                                 | C20H32O3    | 319.2269203          | M-H      | -2.960685962 | 3                 | ↓      |
|       | P13 | 0013461 | 19.75             | SM(d18:1/26:1(17Z))                        | C49H97N2O6P | 877.6558603          | M+K-2H   | -1.392091422 | 2                 | ↑      |
|       | P14 | 0003759 | 18.60             | 5a-Pregnane-3,20-dione                     | C21H32O2    | 677.4522447          | M-H      | -0.312038182 | 4                 | ↑      |
|       | P15 | 0060382 | 5.40              | 3beta-Hydroxypregn-5-en-20-one sulfate     | C21H32O5S   | 415.1942706          | M+F      | -1.401950917 | 5                 | ↑      |
|       | P16 | 0006765 | 19.99             | 2-Methoxy-estradiol-17b 3-glucuronide      | C25H34O9    | 459.2041349          | M-H2O-H  | 3.540906446  | 3                 | ↑      |
|       | P17 | 0001032 | 20.74             | Dehydroepiandrosterone sulfate             | C19H28O5S   | 367.1572338          | M-H      | -3.353725684 | 4                 | ↑      |
|       | P18 | 0000063 | 5.58              | Cortisol                                   | C21H30O5    | 361.200367           | M-H      | -4.63983385  | 9                 | ↑      |
|       | P19 | 0006754 | 5.96              | 11b,21-Dihydroxy-3,20-oxo-5b-pregnan-18-al | C21H32O5    | 363.2161356          | M-H      | -4.28880625  | 14                | ↑      |
|       | P20 | 0000145 | 5.94              | Estrone                                    | C18H22O2    | 329.1792614          | M-H      | 0.88782721   | 7                 | ↑      |

|     |         |       |                                                           |               |             |         |              |    |   |
|-----|---------|-------|-----------------------------------------------------------|---------------|-------------|---------|--------------|----|---|
| P21 | 0000063 | 5.58  | Cortisol                                                  | C21H30O5      | 429.1874587 | M-H     | -4.92991872  | 9  | ↑ |
| P22 | 0000063 | 14.33 | Cortisol                                                  | C21H30O5      | 361.1990629 | M-H     | -4.63983385  | 5  | ↓ |
| P23 | 0006754 | 9.91  | 11b,21-Dihydroxy-3,20-oxo-5b-pregnan-<br>18-al            | C21H32O5      | 385.1982038 | M+Na-2H | -3.948506422 | 7  | ↑ |
| P24 | 0004195 | 4.51  | 5-L-Glutamyl-taurine                                      | C7H14N2O6S    | 253.0511982 | M-H     | 2.719435723  | 10 | ↓ |
| P25 | 0000036 | 5.61  | Taurocholic acid                                          | C26H45NO7S    | 514.283118  | M-H     | -3.485294884 | 7  | ↑ |
| P26 | 0004195 | 5.11  | 5-L-Glutamyl-taurine                                      | C7H14N2O6S    | 253.0507985 | M-H     | 3.218921065  | 10 | ↓ |
| P27 | 0004096 | 4.47  | 5-Methoxyindoleacetate                                    | C11H11NO3     | 204.0659817 | M-H     | -3.096997856 | 12 | ↑ |
| P28 | 0010396 | 9.92  | LysoPC(20:4(8Z,11Z,14Z,17Z)/0:0)                          | C28H50NO7P    | 578.3002386 | M+Cl    | -3.041022578 | 2  | ↑ |
| P29 | 0001190 | 4.49  | Indoleacetaldehyde                                        | C10H9NO       | 158.0603531 | M-H     | -3.99269806  | 3  | ↑ |
| P30 | 0060484 | 1.05  | Indolepyruvate                                            | C11H9NO3      | 238.0232464 | M+Cl    | -1.564934306 | 2  | ↓ |
| P31 | 0003337 | 16.56 | Oxidized glutathione                                      | C20H32N6O12S2 | 611.1341823 | M-H     | -0.249004006 | 2  | ↑ |
| P32 | 0000806 | 18.62 | Myristic acid                                             | C14H28O2      | 249.1832989 | M+Na-2H | -1.310307239 | 2  | ↑ |
| P33 | 0000218 | 1.03  | Orotidylic acid                                           | C10H13N2O11P  | 402.9869625 | M+Cl    | 4.172100199  | 6  | ↑ |
| P34 | 0060423 | 18.44 | 7,8-Dihydro-7-hydroxy-8-S-glutathionyl-<br>benzo[a]pyrene | C30H29N3O7S   | 610.1423377 | M+Cl    | 0.547817024  | 12 | ↑ |
| P35 | 0010384 | 17.03 | LysoPC(18:0)                                              | C26H54NO7P    | 522.3553686 | M-H     | -2.187111707 | 2  | ↓ |
| P36 | 0003556 | 17.38 | Chitobiose                                                | C15H26N2O12   | 425.1417596 | M-H     | 1.083517545  | 7  | ↑ |
| P37 | 0006547 | 18.44 | Stearidonic acid                                          | C18H28O2      | 597.40825   | M-H     | 0.449710047  | 3  | ↑ |
| P38 | 0006733 | 22.64 | CE(22:6(4Z,7Z,10Z,13Z,16Z,19Z))                           | C49H76O2      | 717.5681936 | M-H     | 1.063394566  | 7  | ↓ |
| P39 | 0001294 | 22.30 | 2,3-Diphosphoglyceric acid                                | C3H8O10P2     | 286.9382879 | M+H     | -3.307086773 | 13 | ↑ |
| P40 | 0000085 | 22.29 | Deoxyguanosine                                            | C10H13N5O4    | 288.0703242 | M+Na-2H | -4.108974939 | 8  | ↑ |
| P41 | 0009116 | 23.08 | PE(18:2(9Z,12Z)/P-18:1(11Z))                              | C41H76NO7P    | 746.5109327 | M+Na-2H | 0.447270627  | 4  | ↓ |
| P42 | 0009117 | 23.08 | PE(18:2(9Z,12Z)/P-18:1(9Z))                               | C41H76NO7P    | 746.5109327 | M+Na-2H | 0.447270627  | 4  | ↓ |
| P43 | 0008198 | 24.28 | PC(18:3(9Z,12Z,15Z)/15:0)                                 | C41H76NO8P    | 722.5097498 | M-H2O-H | -4.401917206 | 12 | ↓ |
| P44 | 0009453 | 24.23 | PE(20:5(5Z,8Z,11Z,14Z,17Z)/18:0)                          | C43H76NO8P    | 746.5125641 | M-H2O-H | -0.587595458 | 2  | ↓ |

|      |     |         |       |                                              |             |             |          |              |    |   |
|------|-----|---------|-------|----------------------------------------------|-------------|-------------|----------|--------------|----|---|
|      | P45 | 0009700 | 23.42 | PE(22:6(4Z,7Z,10Z,13Z,16Z,19Z)/22:1(13Z))    | C49H84NO8P  | 958.5646492 | M-H      | -1.731683401 | 3  | ↓ |
|      | P46 | 0009540 | 23.42 | PE(22:1(13Z)/22:6(4Z,7Z,10Z,13Z,16Z,19Z))    | C49H84NO8P  | 958.5646492 | M-H      | -1.731683401 | 3  | ↓ |
|      | P47 | 0009281 | 24.21 | PE(20:1(11Z)/P-18:1(11Z))                    | C43H82NO7P  | 776.5556462 | M+Na-2H  | -2.530737761 | 3  | ↓ |
|      | P48 | 0009282 | 24.21 | PE(20:1(11Z)/P-18:1(9Z))                     | C43H82NO7P  | 776.5556462 | M+Na-2H  | -2.530737762 | 3  | ↓ |
|      | P49 | 0009313 | 24.21 | PE(20:2(11Z,14Z)/P-18:0)                     | C43H82NO7P  | 776.5556462 | M+Na-2H  | -2.530737762 | 3  | ↓ |
|      | P50 | 0009576 | 24.21 | PE(22:2(13Z,16Z)/P-16:0)                     | C43H82NO7P  | 776.5556462 | M+Na-2H  | -2.530737762 | 3  | ↓ |
|      | P51 | 0006825 | 22.06 | Tetrahydrofolyl-[Glu](2)                     | C24H30N8O9  | 593.212969  | M-H      | -1.796408905 | 6  | ↓ |
|      | P52 | 0001557 | 0.76  | Riboflavin reduced                           | C15H16N4O6  | 367.1032806 | M-H      | -0.476009031 | 2  | ↑ |
|      | P53 | 0002925 | 21.07 | Dihomo-gamma-linolenic acid                  | C20H34O2    | 305.2485881 | M-H      | -0.051570628 | 10 | ↑ |
|      | P54 | 0006791 | 6.40  | Melibiotol                                   | C12H24O11   | 343.1250448 | M-H      | 1.335537469  | 2  | ↑ |
|      | P55 | 0000951 | 6.19  | Taurochenodesoxycholic acid                  | C26H45NO6S  | 498.2872855 | M-H      | -4.40055667  | 12 | ↑ |
|      | P56 | 0000195 | 4.50  | Inosine                                      | C10H12N4O5  | 313.0782323 | M+FA-H   | -2.760455674 | 10 | ↑ |
|      | P57 | 0000663 | 4.33  | Glucaric acid                                | C6H10O8     | 269.0482727 | M+Hac-H  | -1.64100219  | 3  | ↓ |
|      | P58 | 0000806 | 13.52 | Myristic acid                                | C14H28O2    | 249.1842291 | M+Na-2H  | 2.765671018  | 3  | ↑ |
|      | P59 | 0010381 | 10.09 | LysoPC(15:0)                                 | C23H48NO7P  | 480.3076509 | M-H      | -3.9728778   | 4  | ↓ |
|      | P60 | 0007855 | 9.91  | LysoPA(18:1(9Z)/0:0)                         | C21H41O7P   | 457.2339923 | M+Na-2H  | 0.765980412  | 2  | ↑ |
|      | P61 | 0000197 | 2.82  | Indoleacetic acid                            | C10H9NO2    | 242.0478595 | M-H      | 4.239021692  | 6  | ↑ |
|      | P62 | 0002925 | 10.41 | Dihomo-gamma-linolenic acid                  | C20H34O2    | 305.2471548 | M-H      | -4.731588045 | 5  | ↑ |
| ESI+ | P63 | 0002995 | 21.26 | 12-Keto-tetrahydro-leukotriene B4            | C20H34O4    | 371.2784315 | M+K      | -2.274127534 | 7  | ↓ |
|      | P64 | 0003208 | 13.49 | Thromboxane                                  | C20H40O     | 360.3239269 | M+ACN+Na | 0.813966482  | 13 | ↓ |
|      | P65 | 0004876 | 23.81 | LacCer(d18:1/25:0)                           | C55H105NO13 | 1029.7939   | M+ACN+H  | 1.530017275  | 7  | ↑ |
|      | P66 | 0012317 | 23.81 | 3-O-Sulfogalactosylceramide (d18:1/18:1(9Z)) | C42H79NO11S | 838.5610    | M+Na     | 2.112738547  | 6  | ↑ |
|      | P67 | 0004949 | 23.50 | Cer(d18:1/16:0)                              | C34H67NO3   | 502.4968369 | M+H-2H2O | -2.61430559  | 2  | ↑ |

|     |         |       |                                         |                |             |          |              |    |   |
|-----|---------|-------|-----------------------------------------|----------------|-------------|----------|--------------|----|---|
| P68 | 0004837 | 23.72 | Galabiosylceramide (d18:1/24:1(15Z))    | C54H101NO13    | 994.7154136 | M+Na     | -1.131331338 | 21 | ↑ |
| P69 | 0001547 | 6.05  | Corticosterone                          | C21H30O4       | 347.2218899 | M+H      | 0.589437874  | 13 | ↓ |
| P70 | 0004096 | 3.75  | 5-Methoxyindoleacetate                  | C11H11NO3      | 250.0450217 | M+Na     | 0.060563635  | 4  | ↑ |
| P71 | 0000122 | 0.71  | D-Glucose                               | C6H12O6        | 203.0522236 | M+H-H2O  | -2.138878061 | 8  | ↑ |
| P72 | 0006547 | 20.12 | Stearidonic acid                        | C18H28O2       | 259.2059895 | M+H      | 1.258637786  | 4  | ↑ |
| P73 | 0000175 | 0.66  | Inosinic acid                           | C10H13N4O8P    | 355.0578571 | M+2Na-H  | 0.034110709  | 5  | ↓ |
| P74 | 0005358 | 23.80 | TG(16:0/16:0/20:0)                      | C55H106O6      | 907.7710875 | M+Na     | 1.137490066  | 7  | ↓ |
| P75 | 0005389 | 23.80 | TG(16:0/18:2(9Z,12Z)/20:1(11Z))         | C57H104O6      | 907.7710875 | M+H-2H2O | -1.609728224 | 7  | ↓ |
| P76 | 0001070 | 23.57 | Octanoyl-CoA                            | C29H50N7O17P3S | 858.2050251 | M+H      | -0.891124617 | 4  | ↑ |
| P77 | 0009379 | 23.57 | PE(20:3(8Z,11Z,14Z)/P-18:0)             | C43H80NO7P     | 753.5874621 | M+Na     | -0.867300072 | 9  | ↑ |
| P78 | 0009346 | 23.57 | PE(20:3(5Z,8Z,11Z)/P-18:0)              | C43H80NO7P     | 753.5874621 | M+H      | -0.867300072 | 9  | ↑ |
| P79 | 0009314 | 23.57 | PE(20:2(11Z,14Z)/P-18:1(11Z))           | C43H80NO7P     | 753.5874621 | M+H      | -0.867300072 | 9  | ↑ |
| P80 | 0009315 | 23.57 | PE(20:2(11Z,14Z)/P-18:1(9Z))            | C43H80NO7P     | 753.5874621 | M+2Na-H  | -0.867300072 | 9  | ↑ |
| P81 | 0004041 | 0.70  | L-Allothreonine                         | C4H9NO3        | 164.0293778 | M+H      | -0.254434235 | 18 | ↓ |
| P82 | 0000883 | 0.71  | L-Valine                                | C5H11NO2       | 118.0859574 | M+Na     | -2.542403153 | 21 | ↓ |
| P83 | 0006857 | 0.72  | Dextrin                                 | C18H32O16      | 527.1581486 | M+H      | -0.212347364 | 16 | ↓ |
| P84 | 0006519 | 23.22 | Stearidonoyl CoA                        | C39H62N7O17P3S | 1026.318768 | M+H      | -2.031738961 | 16 | - |
| P85 | 0000290 | 23.69 | Uridine diphosphate-N-acetylglucosamine | C17H27N3O17P2  | 649.124109  | M+NH4    | -0.181965764 | 17 | ↓ |
| P86 | 0004305 | 12.89 | Farnesol                                | C15H26O        | 240.2322209 | M+Na     | 0.134490285  | 12 | ↑ |
| P87 | 0012453 | 14.99 | 3beta-Hydroxy-5-cholestenoic acid       | C27H44O3       | 417.3362571 | M+Na     | -0.155186646 | 27 | ↑ |
| P88 | 0011154 | 14.09 | LysoPA(P-16:0/0:0)                      | C19H39O6P      | 417.3362571 | M+H-2H2O | -0.897790707 | 18 | ↓ |
| P89 | 0003141 | 13.85 | Retinoyl b-glucuronide                  | C26H36O8       | 441.2252953 | M+H-2H2O | -3.926386828 | 20 | ↓ |
| P90 | 0010318 | 4.99  | Pregnanediol 3-O-glucuronide            | C27H44O8       | 535.2693022 | M+Na     | -1.993791678 | 10 | ↑ |
| P91 | 0011105 | 6.35  | 5-Acetylamino-6-formylamino-3-          | C12H21NO4S2    | 290.0870709 | M+ACN+Na | -2.738468232 | 23 | ↑ |

|      |         |       |                                             |             |             |          |              |    |   |
|------|---------|-------|---------------------------------------------|-------------|-------------|----------|--------------|----|---|
|      |         |       | methyluracil                                |             |             |          |              |    |   |
| P92  | 0011105 | 6.35  | 5-Acetylamino-6-formylamino-3-methyluracil  | C8H10N4O4   | 290.0870709 | M+ACN+Na | 4.84959473   | 23 | ↑ |
| P93  | 0008652 | 20.77 | PC(22:4(7Z,10Z,13Z,16Z)/P-16:0)             | C46H84NO7P  | 838.5584053 | M+Na     | -1.021520748 | 7  | ↑ |
| P94  | 0008456 | 20.77 | PC(20:4(5Z,8Z,11Z,14Z)/P-18:0)              | C46H84NO7P  | 838.5584053 | M+Na     | -1.021520748 | 7  | ↑ |
| P95  | 0001409 | 0.87  | dUMP                                        | C9H13N2O8P  | 353.0119925 | M+Na     | -0.404122646 | 8  | ↓ |
| P96  | 0009710 | 21.80 | PE(22:6(4Z,7Z,10Z,13Z,16Z,19Z)/P-18:1(11Z)) | C45H76NO7P  | 818.5098938 | M+Na     | 3.604809015  | 15 | ↑ |
| P96  | 0009711 | 21.80 | PE(22:6(4Z,7Z,10Z,13Z,16Z,19Z)/P-18:1(9Z))  | C45H76NO7P  | 818.5098938 | M+Na     | 3.604809015  | 15 | ↑ |
| P97  | 0001496 | 21.38 | 7alpha-Hydroxycholesterol                   | C27H46O2    | 243.2104078 | M+H      | -1.148116411 | 3  | ↓ |
| P98  | 0006228 | 18.39 | 24-Hydroxycalcitriol                        | C27H44O4    | 415.3185396 | M+H      | -4.931676159 | 7  | ↑ |
| P99  | 0000827 | 17.84 | Stearic acid                                | C18H36O2    | 285.2797433 | M+Na     | 3.29424837   | 3  | ↑ |
| P101 | 0001227 | 1.17  | 5-Thymidylic acid                           | C10H15N2O8P | 401.0761598 | M+H      | -4.279794928 | 13 | ↑ |
| P102 | 0001517 | 23.53 | AICAR                                       | C9H15N4O8P  | 371.1018086 | M+H      | -0.286035627 | 23 | ↓ |
| P103 | 0000254 | 8.00  | Succinic acid                               | C4H6O4      | 237.0586719 | M+H      | 0.292131609  | 9  | ↑ |
| P104 | 0006556 | 1.01  | L-4-Hydroxyglutamate semialdehyde           | C5H9NO4     | 136.0717    | M+H      | -2.291133552 | 5  | ↓ |
| P105 | 0007942 | 23.13 | PC(15:0/18:3(9Z,12Z,15Z))                   | C41H76NO8P  | 786.4966373 | M+H      | 3.504142032  | 7  | ↑ |
| P106 | 0000570 | 11.75 | Coproporphyrin III                          | C36H38N4O8  | 619.2576422 | M+H-2H2O | 3.868397252  | 3  | ↓ |
| P107 | 0007850 | 10.88 | LysoPA(0:0/18:0)                            | C21H43O7P   | 502.2929364 | M+H      | -4.885840007 | 18 | ↑ |
| P108 | 0000732 | 9.48  | Hydroxykynurenine                           | C10H12N2O4  | 285.1440173 | M+H      | 2.656410522  | 5  | ↑ |
| P109 | 0005779 | 21.80 | PE(P-18:0/20:4(5Z,8Z,11Z,14Z))              | C43H78NO7P  | 751.5695842 | M+H      | -3.92743375  | 12 | ↑ |
