# Supplementary material for: Pueraria thomsonii Radix Water Extract Alleviate Type 2 Diabetes Mellitus in db/db Mice through Comprehensive Regulation of Metabolism and Gut Microbiota
Source: MDPI journal article supplement (doi:10.3390/molecules28227471), 2023-11-07
Supplement: s1 [file s1]

**Supplementary Table S4.** Differential metabolites for Metformin callbacks

| Modle | Name                                       | Normal        | Model          | Metformin     | Up/down |
|-------|--------------------------------------------|---------------|----------------|---------------|---------|
| ESI-  | 13-L-Hydroperoxylinoleic acid              | 5.23±2.75     | 117.8±70.87    | 24.54±29.46   | ↓       |
|       | 13-L-Hydroperoxylinoleic acid              | 0.51±0.50     | 38.89±27.04    | 25.06±52.20   | ↓       |
|       | 15H-11,12-EETA                             | 37.48±21.98   | 2.57±2.25      | 3.70±9.26     | ↑       |
|       | Leukotriene D4                             | 16.42±7.20    | 84.76±37.20    | 40.52±35.08   | ↓       |
|       | Prostaglandin H3                           | 1.51±1.41     | 227.25±126.75  | 138.91±252.25 | ↓       |
|       | 11,12-Epoxyeicosatrienoic acid             | 1.96±2.91     | 79.06±97.48    | 33.47±53.63   | ↓       |
|       | 5a-Pregnane-3,20-dione                     | 419.94±110.86 | 1421.76±580.48 | 654.02±513.41 | ↓       |
|       | 3beta-Hydroxypregn-5-en-20-one sulfate     | 18.02±6.83    | 78.37±38.48    | 50.05±103.88  | ↓       |
|       | 2-Methoxy-estradiol-17b 3-glucuronide      | 51.17±16.50   | 180.9±58.08    | 89.81±69.88   | ↓       |
|       | Cortisol                                   | 42.05±32.20   | 394.79±497.67  | 116.49±242.76 | ↓       |
|       | 11b,21-Dihydroxy-3,20-oxo-5b-pregnan-18-al | 9.27±8.25     | 494.54±478.32  | 472.08±790.00 | ↓       |
|       | Cortisol                                   | 8.07±8.55     | 103.66±146.81  | 25.99±56.50   | ↓       |
|       | Myristic acid                              | 49.01±13.99   | 115.44±29.02   | 53.59±22.00   | ↓       |
|       | 2,3-Diphosphoglyceric acid                 | 52.06±17.34   | 128.62±29.17   | 93.17±33.69   | ↓       |
|       | Deoxyguanosine                             | 50.19±20.83   | 139.25±31.29   | 94.47±39.78   | ↓       |
|       | PE(18:2(9Z,12Z)/P-                         | 853.17±690.86 | 108.02±85.89   | 123.19±173.78 | ↑       |

|      |                                          |                  |                   |                   |   |
|------|------------------------------------------|------------------|-------------------|-------------------|---|
|      | 18:1(11Z))                               |                  |                   |                   |   |
|      | PE(18:2(9Z,12Z)/P-18:1(9Z))              | 853.17±690.86    | 108.02±85.89      | 123.19±173.78     | ↑ |
|      | PE(20:5(5Z,8Z,11Z,14Z,17Z)/18:0)         | 42.38±34.01      | 3.38±4.78         | 4.88±6.29         | ↑ |
|      | Tetrahydrofolyl-[Glu](2)                 | 222.00±144.65    | 50.16±22.42       | 189.22±270.73     | ↑ |
|      | Dihomo-gamma-linolenic acid              | 2179.79±443.66   | 4525.65±1071.58   | 2654.01±1489.12   | ↓ |
|      | Myristic acid                            | 109.84±27.55     | 468.79±144.10     | 128.76±71.83      | ↓ |
|      | Dihomo-gamma-linolenic acid              | 92.62±28.55      | 193.39±72.82      | 133.39±109.52     | ↓ |
| ESI+ | 12-Keto-tetrahydro-leukotriene B4        | 1048.74±973.85   | 395.47±129.55     | 465.45±143.25     | ↑ |
|      | LacCer(d18:1/25:0)3-O-                   | 112.72±110.16    | 1676.13±1378.91   | 889.08±635.88     | ↓ |
|      | Sulfogalactosylceramide (d18:1/18:1(9Z)) | 24082.3±17753.64 | 68158.93±57739.78 | 37987.34±23998.72 | ↓ |
|      | Cer(d18:1/16:0)                          | 117.63±55.76     | 399.94±286.03     | 397.75±277.39     | ↓ |
|      | D-Glucose                                | 601.99±189.28    | 3014.81±953       | 969.77±855.22     | ↓ |
|      | PE(20:3(8Z,11Z,14Z)/P-18:0)              | 1464.82±912.57   | 4857.29±3210.04   | 4517.88±4230.66   | ↓ |
|      | PE(20:3(5Z,8Z,11Z)/P-18:0)               | 1464.82±912.57   | 4857.29±3210.04   | 4517.88±4230.66   | ↓ |
|      | PE(20:2(11Z,14Z)/P-18:1(11Z))            | 1464.82±912.57   | 4857.29±3210.04   | 4517.88±4230.66   | ↓ |
|      | PE(20:2(11Z,14Z)/P-                      | 1464.82±912.57   | 4857.29±3210.04   | 4517.88±4230.66   | ↓ |

|                                            |                   |                   |                   |   |
|--------------------------------------------|-------------------|-------------------|-------------------|---|
| 18:1(9Z))                                  |                   |                   |                   |   |
| L-Allothreonine                            | 231.76±53.49      | 36.28±10.82       | 80.66±26.25       | ↑ |
| Dextrin                                    | 455.29±127.05     | 32.62±21.97       | 63.12±49.13       | ↑ |
| Farnesol                                   | 209.95±36.21      | 574.61±483.27     | 572.22±453.66     | ↓ |
| 3beta-Hydroxy-5-cholestenoic acid          | 10.61±12.32       | 552.16±255.49     | 488.98±187.49     | ↓ |
| Retinoyl b-glucuronide                     | 451.78±91.88      | 201.27±55.26      | 206.01±65.41      | ↑ |
| Pregnanediol 3-O-glucuronide               | 1.16±1.52         | 596.71±1494.4     | 160.17±501.95     | ↓ |
| 5-Acetylamino-6-formylamino-3-methyluracil | 25.90±10.73       | 396.87±711.02     | 98.70±166.11      | ↓ |
| 5-Acetylamino-6-formylamino-3-methyluracil | 25.90±10.73       | 396.87±711.02     | 98.70±166.11      | ↓ |
| PC(22:4(7Z,10Z,13Z,16Z)/P-16:0)            | 14591.12±15077.24 | 57314.16±73203.13 | 30779.08±31862.64 | ↓ |
| PC(20:4(5Z,8Z,11Z,14Z)/P-18:0)             | 14591.12±15077.24 | 57314.16±73203.13 | 30779.08±31862.64 | ↓ |
| dUMP                                       | 324.58±123.12     | 103.79±29.58      | 130.73±32.29      | ↑ |
| 5-Thymidylic acid                          | 497.61±544.12     | 2122.12±1346.42   | 1780.46±524.14    | ↓ |
| AICAR                                      | 5991.18±3895.68   | 2990.63±976.2     | 2331.56±452.19    | ↓ |
| Succinic acid                              | 157.26±37.15      | 608.65±330.25     | 330.88±157.75     | ↓ |
| L-4-Hydroxyglutamate semialdehyde          | 365.55±79.29      | 124.77±26.37      | 151.44±53.75      | ↑ |
| PC(15:0/18:3(9Z,12Z,15Z))                  | 267.03±318.75     | 733±522.52        | 553.37±260.70     | ↓ |
| LysoPA(0:0/18:0)                           | 26.43±15.31       | 245.75±140.45     | 102.08±63.76      | ↓ |
| Hydroxykynurenine                          | 111.64±31.68      | 316.89±71.56      | 180.43±83.52      | ↓ |
